# Supplementary material for: Dental microwear texture gradients in guinea pigs reveal that material properties of the diet affect chewing behaviour
Source: Oxford University Press journal article supplement (doi:10.1242/jeb.242446), 2021-06-14
Supplement: jeb242446supp.pdf [file jeb242446supp.pdf]

**Table S1. Dental microwear texture parameter descriptions.** Standard and units according to ISO 25178, motif, furrow, texture direction, texture isotropy, and flatness (ISO 12781) analysis and scale-sensitive fractal analysis (SSFA). Functional group has been assigned by the authors for easier reference to similar parameters.

| Parameter     | Description (condition)                                                                           | Standard  | Functional group | Unit                          |
|---------------|---------------------------------------------------------------------------------------------------|-----------|------------------|-------------------------------|
| <i>Sda</i>    | Closed dale area                                                                                  | ISO 25178 | Area             | $\mu\text{m}^2$               |
| <i>Sha</i>    | Closed hill area                                                                                  | ISO 25178 | Area             | $\mu\text{m}^2$               |
| <i>mea</i>    | Mean area                                                                                         | Motif     | Area             | $\mu\text{m}^2$               |
| <i>Sdr</i>    | Developed interfacial area ratio                                                                  | ISO 25178 | Complexity       | %                             |
| <i>nMotif</i> | Number of motifs                                                                                  | Motif     | Complexity       | no unit                       |
| <i>Asfc</i>   | Area-scale functional complexity                                                                  | SSFA      | Complexity       |                               |
| <i>Sal</i>    | Auto-correlation length ( $s = 0.2$ )                                                             | ISO 25178 | Density          | $\mu\text{m}$                 |
| <i>Spd</i>    | Density of peaks                                                                                  | ISO 25178 | Density          | $1/\mu\text{m}^2$             |
| <i>medf</i>   | Mean density of furrows                                                                           | Furrow    | Density          | $\text{cm}/\text{cm}^2$       |
| <i>Std</i>    | Texture direction                                                                                 | ISO 25178 | Direction        | –                             |
| <i>Str</i>    | Texture aspect ratio ( $s = 0.2$ )                                                                | ISO 25178 | Direction        | no unit                       |
| <i>Tr1R</i>   | First direction                                                                                   | Direction | Direction        | –                             |
| <i>Tr2R</i>   | Second direction                                                                                  | Direction | Direction        | –                             |
| <i>Tr3R</i>   | Third direction                                                                                   | Direction | Direction        | –                             |
| <i>IsT</i>    | Texture isotropy                                                                                  | Isotropy  | Direction        | %                             |
| <i>epLsar</i> | Anisotropy                                                                                        | SSFA      | Direction        |                               |
| <i>S10z</i>   | Ten-point height                                                                                  | ISO 25178 | Height           | $\mu\text{m}$                 |
| <i>S5p</i>    | Five-point peak height                                                                            | ISO 25178 | Height           | $\mu\text{m}$                 |
| <i>S5v</i>    | Five-point valley height                                                                          | ISO 25178 | Height           | $\mu\text{m}$                 |
| <i>Sa</i>     | Arithmetic mean height or mean surface roughness                                                  | ISO 25178 | Height           | $\mu\text{m}$                 |
| <i>Sku</i>    | Kurtosis of the height distribution                                                               | ISO 25178 | Height           | no unit                       |
| <i>Sp</i>     | Maximum peak height, height between highest peak and mean plane                                   | ISO 25178 | Height           | $\mu\text{m}$                 |
| <i>Sq</i>     | Standard deviation of the height distribution, or RMS surface roughness                           | ISO 25178 | Height           | $\mu\text{m}$                 |
| <i>Ssk</i>    | Skewness of the height distribution                                                               | ISO 25178 | Height           | no unit                       |
| <i>Sv</i>     | Maximum pit height, depth between the mean plane and the deepest valley                           | ISO 25178 | Height           | $\mu\text{m}$                 |
| <i>Sxp</i>    | Peak extreme height difference between $p = 50\%$ and $q = 97.5\%$                                | ISO 25178 | Height           | $\mu\text{m}$                 |
| <i>Sz</i>     | Maximum height, height between the highest peak and the deepest valley                            | ISO 25178 | Height           | $\mu\text{m}$                 |
| <i>meh</i>    | Mean height                                                                                       | Motif     | Height           | $\mu\text{m}$                 |
| <i>madf</i>   | Maximum depth of furrows                                                                          | Furrow    | Height           | $\mu\text{m}$                 |
| <i>metf</i>   | Mean depth of furrows                                                                             | Furrow    | Height           | $\mu\text{m}$                 |
| <i>FLTt</i>   | Peak to valley flatness deviation of the surface (Gaussian Filter, 0.025 mm)                      | ISO 12781 | Height           | $\mu\text{m}$                 |
| <i>FLTp</i>   | Peak to reference flatness deviation (Gaussian Filter, 0.025 mm)                                  | ISO 12781 | Height           | $\mu\text{m}$                 |
| <i>FLTv</i>   | Reference to valley flatness deviation (Gaussian Filter, 0.025 mm)                                | ISO 12781 | Height           | $\mu\text{m}$                 |
| <i>FLTq</i>   | Root mean square flatness deviation (Gaussian Filter, 0.025 mm)                                   | ISO 12781 | Height           | $\mu\text{m}$                 |
| <i>Spc</i>    | Arithmetic mean peak curvature                                                                    | ISO 25178 | Peak sharpness   | $1/\mu\text{m}$               |
| <i>Smc</i>    | Inverse areal material ratio ( $p = 10\%$ )                                                       | ISO 25178 | Plateau size     | $\mu\text{m}$                 |
| <i>Smr</i>    | Areal material ration, bearing area at given height ( $c = 1 \mu\text{m}$ under the highest peak) | ISO 25178 | Plateau size     | $\mu\text{m}$                 |
| <i>Sdq</i>    | Root mean square gradient                                                                         | ISO 25178 | Slope            | no unit                       |
| <i>Sdv</i>    | Closed dale volume                                                                                | ISO 25178 | Volume           | $\mu\text{m}^3$               |
| <i>Shv</i>    | Closed hill volume                                                                                | ISO 25178 | Volume           | $\mu\text{m}^3$               |
| <i>Vm</i>     | Material volume at a given material ratio ( $p = 10\%$ )                                          | ISO 25178 | Volume           | $\mu\text{m}^3/\mu\text{m}^2$ |
| <i>Vmp</i>    | Material volume of the peaks                                                                      | ISO 25178 | Volume           | $\mu\text{m}^3/\mu\text{m}^2$ |
| <i>Vmc</i>    | Material volume of the core at given material ratio ( $p = 10\%$ , $q = 80\%$ )                   | ISO 25178 | Volume           | $\mu\text{m}^3/\mu\text{m}^2$ |
| <i>Vv</i>     | Void volume at a given material ratio ( $p = 10\%$ )                                              | ISO 25178 | Volume           | $\mu\text{m}^3/\mu\text{m}^2$ |
| <i>Vvc</i>    | Void volume of the core ( $p = 10\%$ , $q = 80\%$ )                                               | ISO 25178 | Volume           | $\mu\text{m}^3/\mu\text{m}^2$ |
| <i>Vvv</i>    | Void volume of the valley at a given material ratio ( $p = 80\%$ )                                | ISO 25178 | Volume           | $\mu\text{m}^3/\mu\text{m}^2$ |

**Table S2. General linear models for natural diets with the variables Diet and Tooth, as well as the interaction between them, as fixed effects.** Lf = lucerne fresh, Ld = lucerne dry, Gf = grass fresh, Gd = grass dry, Bf = bamboo fresh, Bd = bamboo dry. \*ranked data, °log-transformed data. Please see separate supplementary excel file.

[Click here to download Table S2](#)

**Table S3. General linear models for pelleted diets with the variables Diet and Tooth, as well as the interaction between them, as fixed effects.** IsoL = lucerne pellet, C = abrasive-free control pellet, 4sS 4% small quartz, 8sS 8% small quartz, 4lS 4% large quartz, 4lVA 4% large volcanic ash. \*ranked data, °log-transformed data. Please see separate supplementary excel file.

[Click here to download Table S3](#)

**Table S4. Random draws comprising either 25% or 75% of all teeth from natural diet groups.** <sup>a</sup>Number of random draws differs from 10000 because random samples that did not cover all 6 diets were discarded. <sup>b</sup>Spearman's rank correlation coefficient of the diet ranking based on 100% of available teeth compared to the diet ranking based on a subsample. <sup>c</sup>Proportion of comparisons of the subsample diet ranking with the 100% diet ranking that produced significant correlations (at  $P < 0.05$ ). Parameters with a proportion of  $\geq 0.70$  set in **bold**. Please see separate supplementary excel file.

[Click here to download Table S4](#)

**Table S5. Random draws comprising either 25% or 75% of all teeth from pelleted diet groups.** <sup>a</sup>Number of random draws differs from 10000 because random samples that did not cover all 6 diets were discarded. <sup>b</sup>Spearman's rank correlation coefficient of the diet ranking based on 100% of available teeth compared to the diet ranking based on a subsample. <sup>c</sup>Proportion of comparisons of the subsample diet ranking with the 100% diet ranking that produced significant correlations (at  $P < 0.05$ ). Parameters with a proportion of  $\geq 0.70$  set in **bold**. Please see separate supplementary excel file.

[Click here to download Table S5](#)

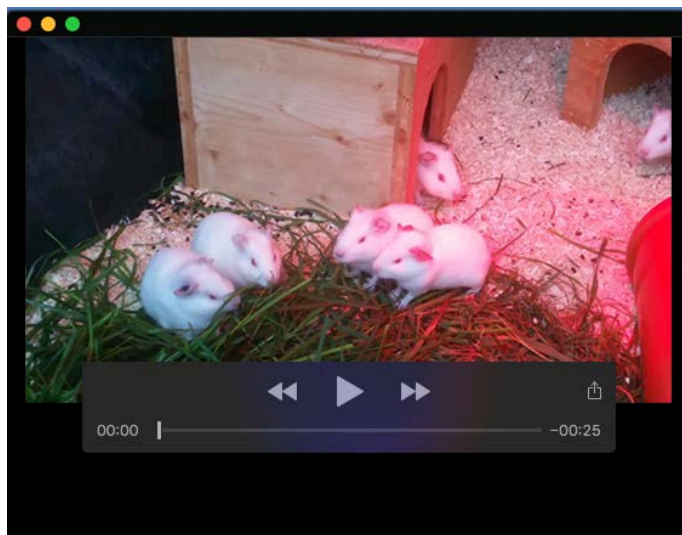

**Movie 1. Guinea pigs feeding on fresh grass.** Note the continuous ingestion of grass blades ('conveyor belt' feeding strategy).
